# Supplementary material for: Durable and transparent super anti-wetting coatings with excellent liquid repellency and anti-fouling performance based on fluorinated polysiloxane
Source: Royal Society of Chemistry journal article supplement (doi:10.1039/d2nj00880g), 2022-01-01
Supplement: d2nj00880g1.pdf [file d2nj00880g1.pdf]

## Supporting Information

### **Durable and transparent super anti-wetting coatings with excellent liquid repellency and anti-fouling performance based on fluorinated polysiloxane**

Wenrui Dong,<sup>†a</sup> Bucheng Li,<sup>†c</sup> Jinfei Wei,<sup>c</sup> Weidong Liang,<sup>\*a</sup> Junping Zhang<sup>\*b,c</sup>

<sup>a</sup> Department of Chemical Engineering, College of Petrochemical Engineering, Lanzhou University of Technology, Lanzhou 730050, P.R. China. E-mail: wdliangh@lut.edu.cn.

<sup>b</sup> Center of Materials Science and Optoelectronics Engineering, University of Chinese Academy of Sciences, Beijing 100049, P.R. China. E-mail: jpzhang@licp.cas.cn.

<sup>c</sup> Center of Eco-Material and Green Chemistry, Lanzhou Institute of Chemical Physics, Chinese Academy of Sciences, Lanzhou 730000, P.R. China.

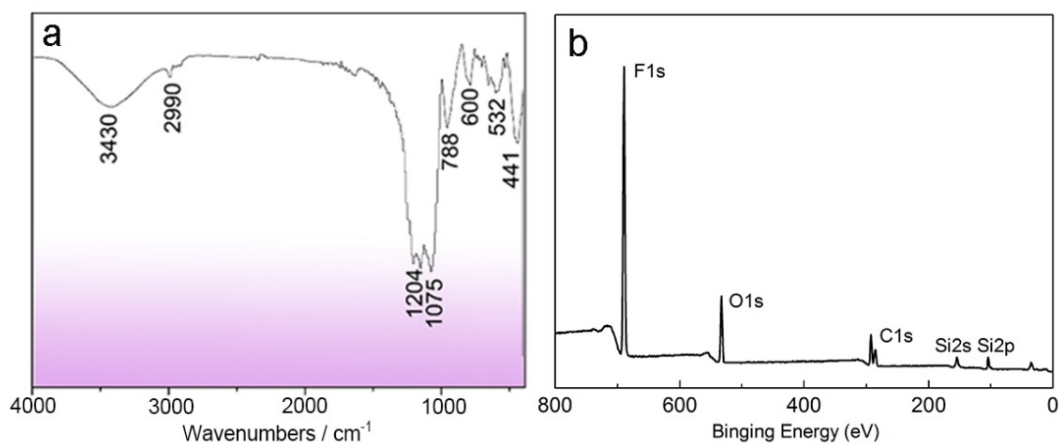

**Fig. S1** (a) FTIR spectrum of fluoroPOS and (b) XPS survey spectrum of the fluoroPOS coating.

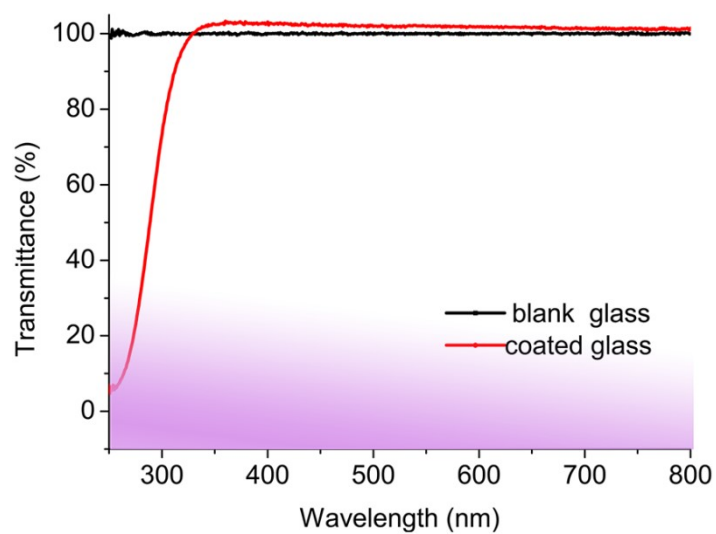

**Fig. S2** Transmittance of the fluoroPOS coated glass slide with the bare glass slide as the reference.

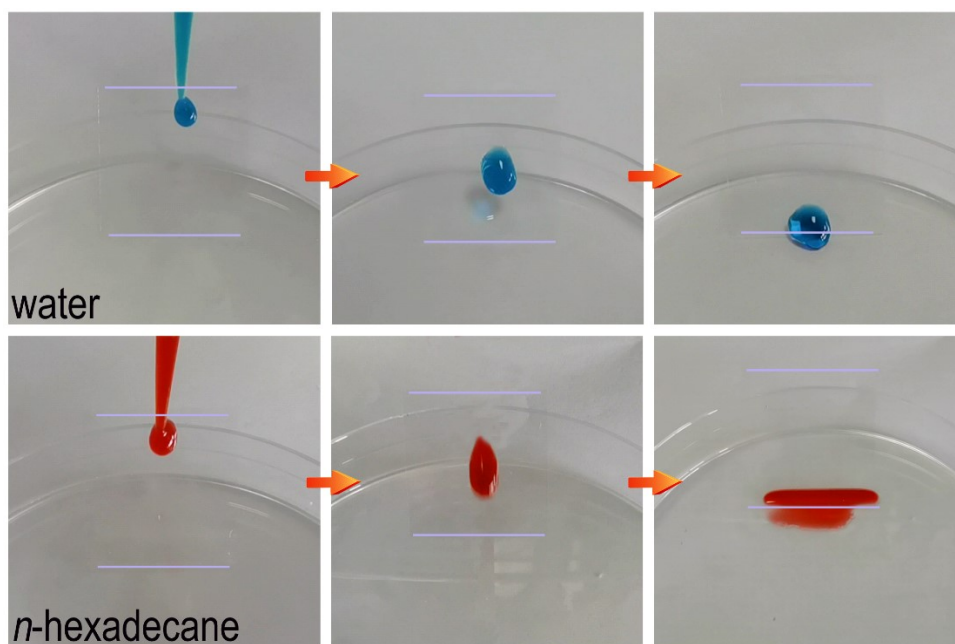

**Fig. S3** Sliding off of water (dyed blue) and *n*-hexadecane (dyed red) droplets (20  $\mu$ L) from the 20° tilted fluoroPOS coating (slide distance = 24 mm).

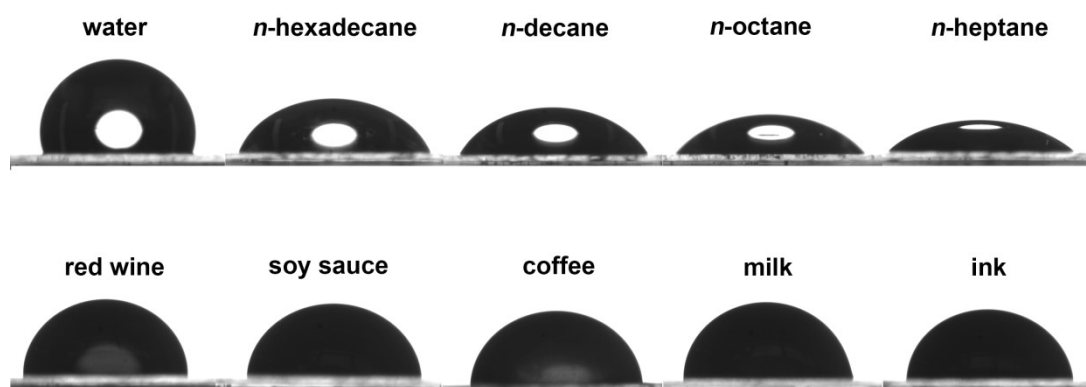

**Fig. S4** Static CA images of various liquids (20  $\mu$ L) on the surface of the fluoroPOS super anti-wetting coating.

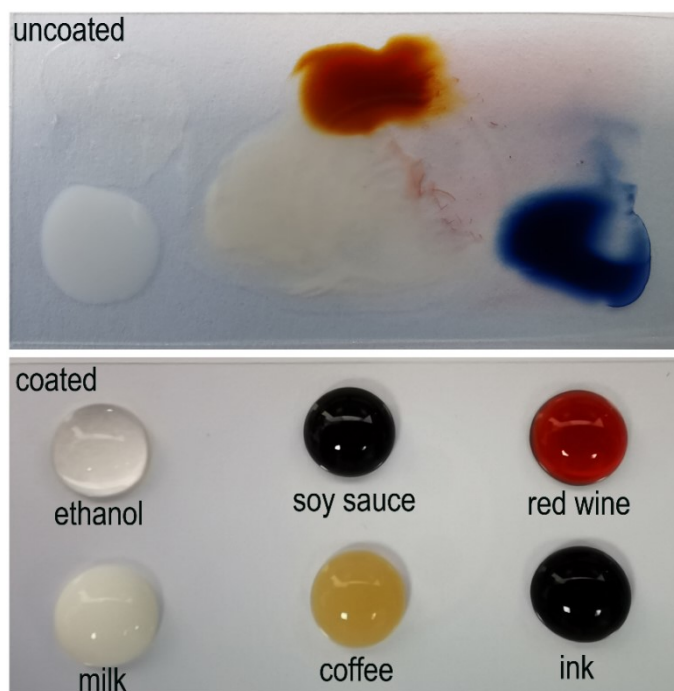

**Fig. S5** Photographs showing difference in repellency towards various liquids (20  $\mu\text{L}$ ) between the bare glass slide and fluoroPOS coated glass slide.

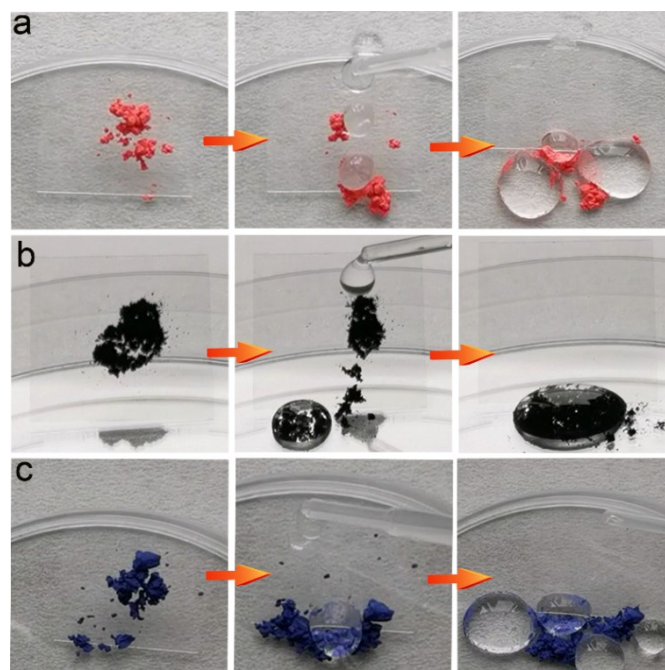

**Fig. S6** Removal of the (a) carbon nanotubes (b) red and (c) blue thermochromic powder on the 20° tilted fluoroPOS coated glass slide at room temperature.

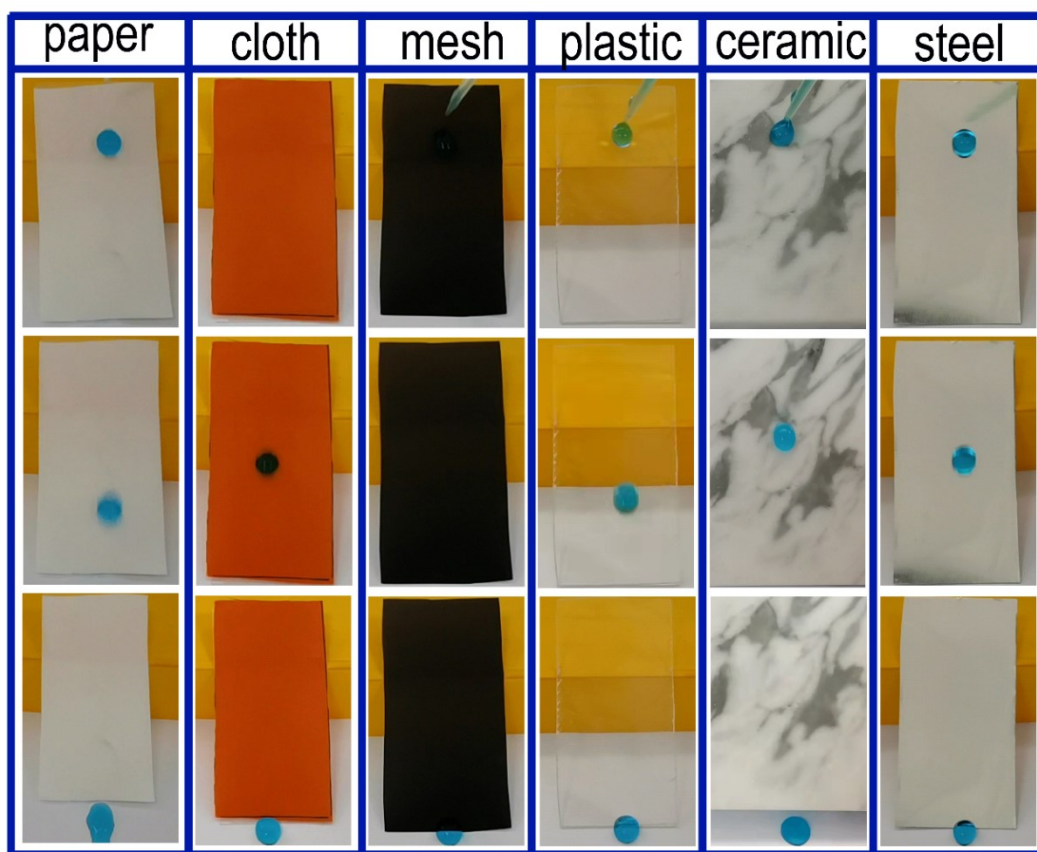

**Fig. S7** Sliding off of water (dyed blue, 20  $\mu$ L) from the 20° tilted fluoroPOS coatings on different substrates.
